# Supplementary material for: Combination of (interferon beta-1b, lopinavir/ritonavir and ribavirin) versus favipiravir in hospitalized patients with non-critical COVID-19: A cohort study
Source: PLOS journal article supplement (doi:10.1371/journal.pone.0252984), 2021-06-10
Supplement: S2 (10.1371/journal.pone.0252984.s002) [file journal.pone.0252984.s002]

**S2 Table. Primary outcome of mortality at 28 days.**

| <b>Variable</b>                         | <b>Model 1</b>   | <b>Model 2</b>   |
|-----------------------------------------|------------------|------------------|
| Triple combination therapy, HR (95% CI) | 1.00 (0.57-1.76) | 0.27 (0.08-0.88) |
| C statistic*                            | 0.722            | 0.859            |
| Akaike Information Criterion*           | 198.5            | 90.4             |
| <i>P</i> value                          | 0.182            | 0.005            |

Model 1; Patient baseline variables at admission; Age, Male sex, body mass index, and SpO2.  
Model 2; Patient COVID-19 related severity variables during hospital stay; serum CRP, ferritin, D-Dimer, and bilirubin levels, WBC, oxygen needs and systemic use of dexamethasone.

Immortal time bias was accounted for in the Cox proportional models as triple combination therapy was as time-dependent variables.

\*Higher values for C statistic and lower values for Akaike Information Criterion indicate better models.
