# Supplementary material for: Combination of (interferon beta-1b, lopinavir/ritonavir and ribavirin) versus favipiravir in hospitalized patients with non-critical COVID-19: A cohort study
Source: PLOS journal article supplement (doi:10.1371/journal.pone.0252984), 2021-06-10
Supplement: S3 (10.1371/journal.pone.0252984.s003) [file journal.pone.0252984.s003]

**S3 Table. Secondary outcome of mechanical ventilation.**

| <b>Variable</b>                         | <b>Model 1</b>   | <b>Model 2</b>   |
|-----------------------------------------|------------------|------------------|
| Triple combination therapy, HR (95% CI) | 1.27 (0.88-1.84) | 1.22 (0.68-2.20) |
| C statistic*                            | 0.322            | 0.538            |
| Akaike Information Criterion*           | 378.1            | 207.4            |
| <i>P</i> value                          | 0.076            | 0.027            |

Model 1; Patient baseline variables at admission; Age, Male sex, body mass index, and SpO<sub>2</sub>.  
Model 2; Patient COVID-19 related severity variables during hospital stay; serum CRP, ferritin, D-Dimer, and bilirubin levels, WBC, oxygen needs and systemic use of dexamethasone.  
Immortal time bias was accounted for in the Cox proportional models as triple combination therapy was as time-dependent variables.

\*Higher values for C statistic and lower values for Akaike Information Criterion indicate better models.
